# Supplementary material
Source: PubMed Central journal article supplement (PMC4496291)
Supplement: NIHMS664703-supplement-1.pdf [file NIHMS664703-supplement-1.pdf]

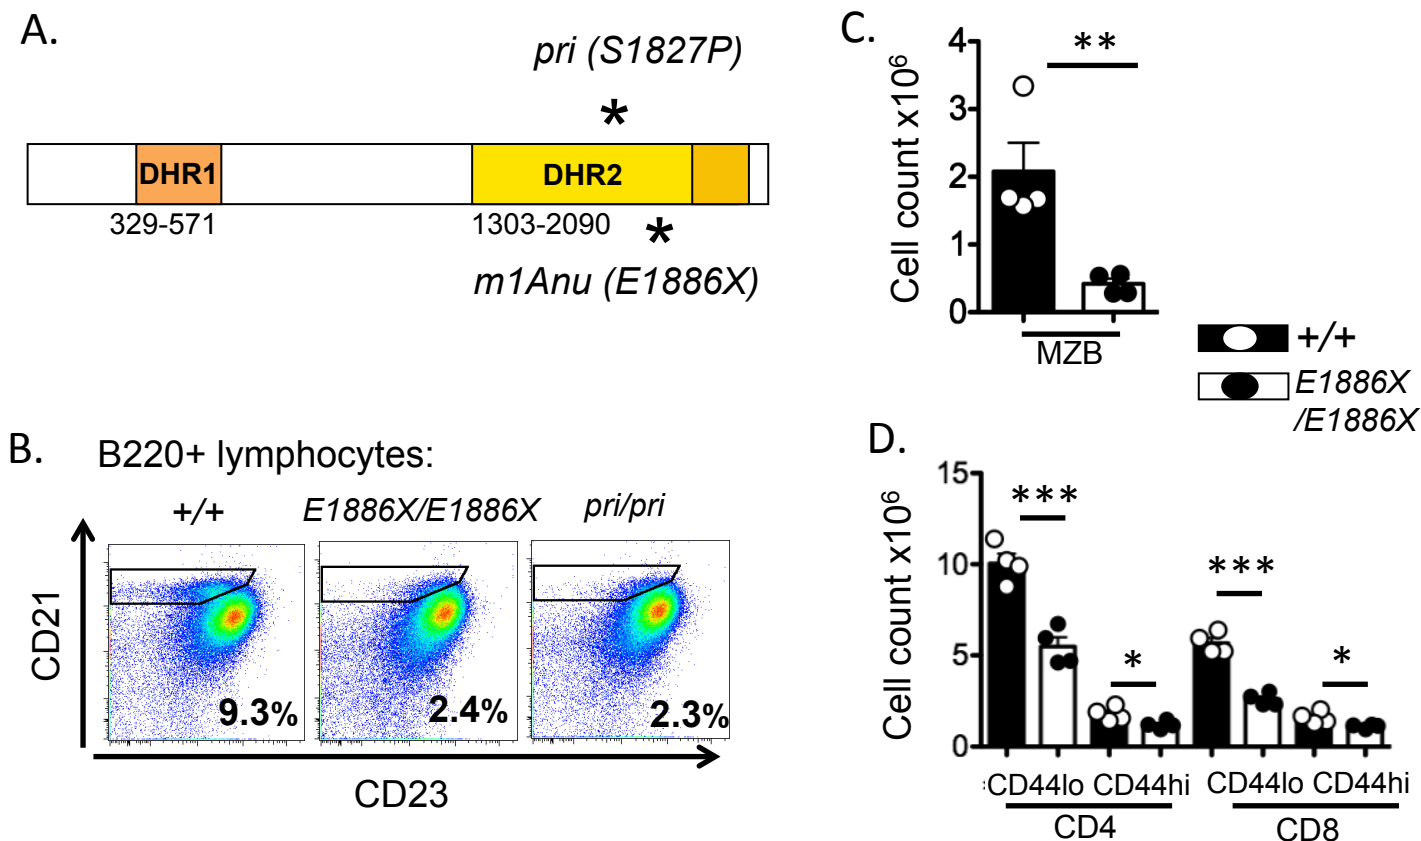

### Supplementary Figure 1: DOCK8 mutant mice

- A. Schematic showing the position of the two mutations in the DOCK8 protein; DHR (Dock Homology Region).
- B. Representative flow cytometry plots showing B220 positive splenocytes. Marginal zone B cells are gated and the percentage shown for wild type and two DOCK8 mutants as marked.
- C. Quantitation from a separate experiment of marginal zone B (MZB) cells in wild type and DOCK8<sup>*E1886X/E1886X*</sup> mice. Columns show means; dots, individual mice and bars, standard error of the mean (SEM). Statistics by unpaired t test, \*\*  $p < 0.01$ . Representative of 2 separate experiments.
- D. Quantitation of splenic T cells from wild type and DOCK8<sup>*E1886X/E1886X*</sup> mice recapitulating the decreased naïve T cells found in DOCK8 mutant mice. Columns show means; dots, individual mice and bars, SEM. Statistics by unpaired t test, \*  $p < 0.05$ , \*\*\*  $p < 0.001$ . Representative of 2 separate experiments.
